# Supplementary material for: Chikungunya Virus Asian Lineage Infection in the Amazon Region Is Maintained by Asiatic and Caribbean-Introduced Variants
Source: MDPI journal article supplement (doi:10.3390/v14071445), 2022-06-30
Supplement: s1 [file s1]

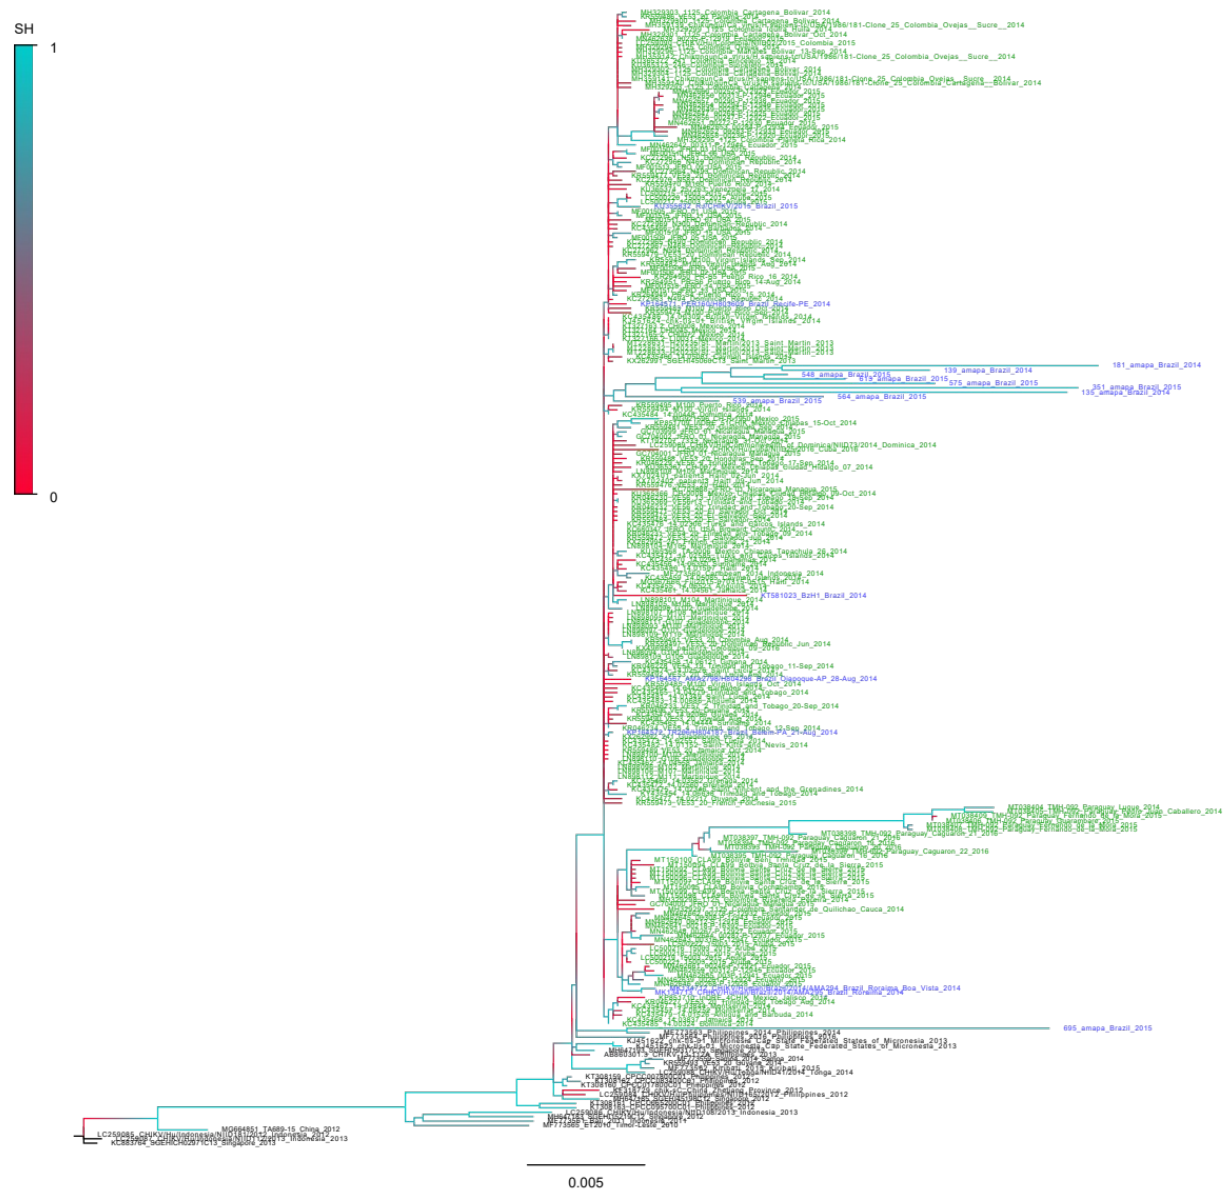

**Figure S1.** Maximum likelihood tree of CHIKV-Asian lineage. The unrooted tree was constructed using reference genomes of CHIKV-Asian lineage. Sequences from Brazil are indicated in blue. Sequences from Caribbean countries are in green color and sequences from South Asia/Oceania are in black color. The cluster composed by Caribbean sequences plus almost all Brazilian sequences is labeled. The Brazilian sequence related with a Philippine sequences is highlighted. The branch support is indicated by a color scale of 0 to 1, and is based on the Shimodaira-Hasegawa-like test. The tree was inferred using the TN-93 model plus gamma correction. Horizontal bar indicate the nucleotide substitution per base.

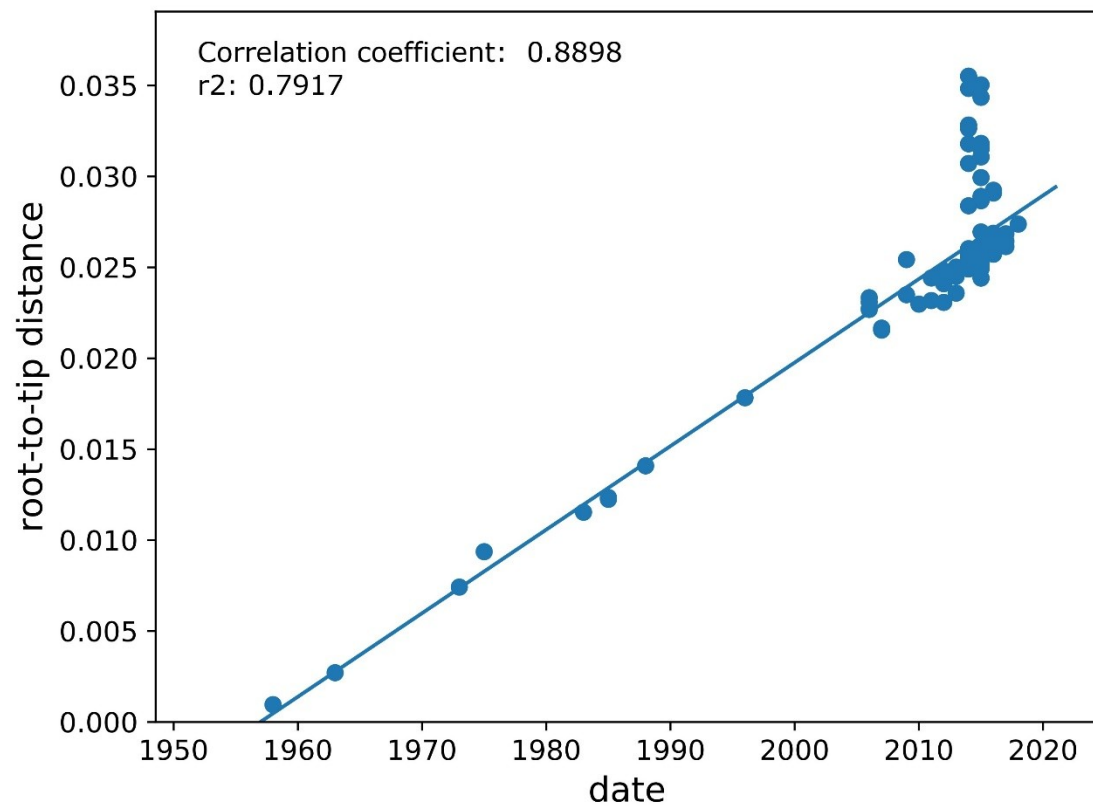

**Figure S2.** Linear regression analysis. root-to-tip genetic distance against year of sampling for 297 CHIKV Asian lineage sequences. Linear regression was performed and the trend line and R-squared value ( $r^2$ ) are indicated.

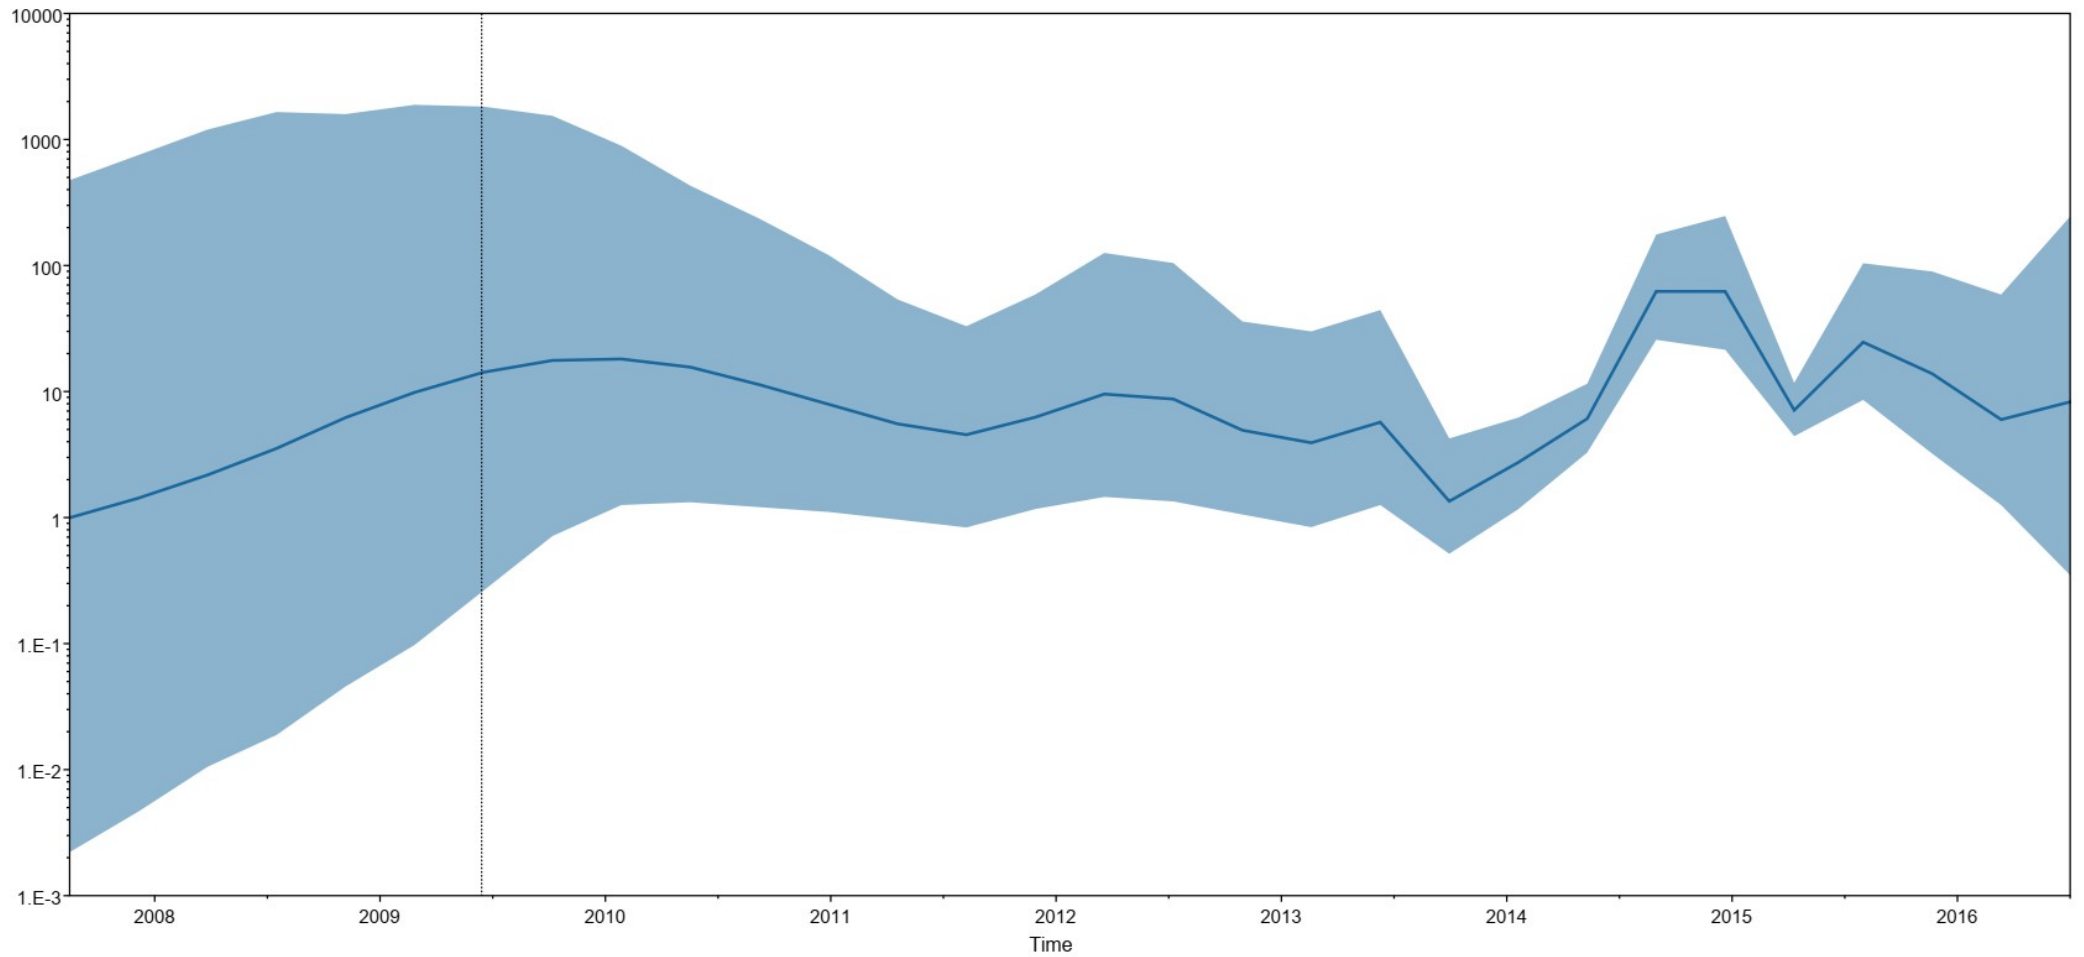

**Figure S3.** Skygrid demographic of CHIKV. The reconstruction plot, based on relaxed-clock coalescent analysis. X-axis represents time in years, while Y-axis shows the Effective population size at time  $t$  ( $N_e(t)$ ). The thick black line represents the median, while the blue band represents 95% highest posterior density (HPD) intervals.
